1 **Title: Health outcomes in Deaf signing populations: a systematic review**

2

3 **Authors and affiliations:**

4 Dr Katherine D Rogers<sup>1\*</sup>, Miss Aleix Rowlandson<sup>2</sup>, Dr James Harkness<sup>3</sup>, Ms Gemma Shields<sup>2</sup>,  
5 Professor Alys Young<sup>1</sup>

6

7 <sup>1</sup> Division of Nursing, Midwifery and Social Work, University of Manchester, Manchester, UK

8 <sup>2</sup> Division of Population Health, Health Services Research & Primary Care, University of  
9 Manchester, Manchester, UK

10 <sup>3</sup> Imperial College Healthcare NHS Trust, London, UK

11

12 **\*Corresponding author:** Dr Katherine D Rogers, Social Research with Deaf people (SORD),  
13 Division of Nursing, Midwifery and Social Work, School of Health Sciences, Faculty of  
14 Biology, Medicine and Health, Jean McFarlane Building, University of Manchester, Oxford  
15 Road, Manchester, M13 9PL. Email: [Katherine.rogers@manchester.ac.uk](mailto:Katherine.rogers@manchester.ac.uk)

16

17 **Author contributions** - Contributor role of the following authors are as follows:

18 **KR** Conceptualization; Data Curation; Formal Analysis; Funding Acquisition; Investigation;  
19 Methodology; Project Administration; Resources; Validation; Visualization; Writing –  
20 Original Draft Preparation; Writing – Review & Editing

21 **AR** Data Curation; Formal Analysis; Investigation; Methodology; Project Administration;  
22 Resources; Validation; Visualization; Writing – Original Draft Preparation; Writing – Review  
23 & Editing

24 **JH** Investigation; Validation; Writing – Original Draft Preparation; Writing – Review & Editing

- 25 **GS** Conceptualization; Formal Analysis; Methodology; Validation; Writing – Original Draft
- 26 Preparation; Writing – Review & Editing
- 27 **AY** Conceptualization; Investigation; Methodology; Validation; Visualization; Writing –
- 28 Original Draft Preparation; Writing – Review & Editing

29 **TITLE**

30 Health outcomes in Deaf signing populations: a systematic review

31

32 **ABSTRACT**

33 **Objectives:** (i) To identify peer reviewed publications reporting the mental and/or physical  
34 health outcomes of Deaf adults who are sign language users and to synthesise evidence; (ii)  
35 If data available, to analyse how the health of the adult Deaf population compares to that of  
36 the general population; (iii) to evaluate the quality of evidence in the identified publications;  
37 (iv) to identify limitations of the current evidence base and suggest directions for future  
38 research.

39 **Design:** Systematic review.

40 **Data sources:** Medline, Embase, PsychINFO, and Web of Science

41 **Eligibility criteria for selecting studies:** The inclusion criteria were Deaf adult populations  
42 who used a signed language, all study types, including methods-focused papers which also  
43 contain results in relation to health outcomes of Deaf signing populations. Full-text articles,  
44 published in peer-review journals were searched up to 13<sup>th</sup> June 2023, published in English  
45 or a signed language such as ASL (American Sign Language).

46 **Data extraction:** Supported by the Rayyan systematic review software, two authors  
47 independently reviewed identified publications at each screening stage (primary and  
48 secondary). A third reviewer was consulted to settle any disagreements. Comprehensive  
49 data extraction included research design, study sample, methodology, findings, and a  
50 quality assessment.

51 **Results:** Of the 35 included studies, the majority (25 out of 35) concerned mental health  
52 outcomes. The findings from this review highlighted the inequalities in health and mental

53 health outcomes for Deaf signing populations in comparison with the general population,  
54 gaps in the range of conditions studied in relation to Deaf people, and the poor quality of  
55 available data.

56 **Conclusions:** Population sample definition and consistency of standards of reporting of  
57 health outcomes for Deaf people who use sign language should be improved. Further  
58 research on health outcomes not previously reported is needed to gain better  
59 understanding of Deaf people's state of health.

60

#### 61 **Strengths and limitations of this study:**

- 62 • This is the first systematic review of health and mental health outcomes that focused  
63 solely on evidence concerning Deaf adults who are sign language users as a distinct  
64 population rather than their incorporation within broader based health outcomes  
65 studies about deaf people in general. The review is international in scope and covers  
66 the health outcomes of Deaf adult sign language users across the globe.
- 67 • This systematic review was carried out following the PRISMA guidelines by a  
68 multidisciplinary team of Deaf and hearing health service researchers from varied  
69 backgrounds.
- 70 • The weakness of many studies is clearly distinguishing the population of deaf sign  
71 language users within their samples, results in discarding some evidence that might  
72 have otherwise been helpful.

73

#### 74 **Original protocol for the study:**

75 Prospero registration:

76 [https://www.crd.york.ac.uk/prospero/display\\_record.php?RecordID=182609](https://www.crd.york.ac.uk/prospero/display_record.php?RecordID=182609)

77

78 **A funding statement:** This review is partly funded by Dr Katherine Rogers's NIHR (National  
79 Institute of Health and Care Research) Post-Doctoral Fellowship (NIHR award reference  
80 number: PDF-2018-ST2-004). The views expressed in this publication are those of the  
81 author(s) and not necessarily those of the NIHR, NHS or the UK Department of Health and  
82 Social Care.

83

84 **A competing interests statement:** There are no competing interests to report.

## 85 INTRODUCTION

86 Globally, WHO estimate that 466 million individuals are living with what they define as a  
87 “disabling hearing loss” with this figure expected to reach over 700 million by 2050 [1]. Of  
88 those it is estimated that over 70 million people use one of over 300 sign languages  
89 worldwide [2, 3]. Signed languages are not visual versions of the spoken language of a  
90 country or nation, they are separate, fully grammatical living languages in their own right  
91 [4]. Deaf individuals do not perceive being deaf as a disability, and together form a  
92 community, with their own distinct language, culture and history [5]. Conventionally the  
93 upper case ‘Deaf’ is used to distinguish them from the greater population of deaf people  
94 who are spoken language users and not affiliated with Deaf communities. This distinction  
95 between deaf and Deaf is not based on degrees of deafness in an audiological sense, but is  
96 rather a sociological distinction, based on cultural-linguistic identity.

97 Poorer health and mental health outcomes among Deaf communities have been previously  
98 observed when compared with the general population [6, 7, 8, 9]. Suboptimal management  
99 of physical health conditions is also common, posing not just immediate health risk but  
100 increasing the risk of long-term complications. A UK study using the EQ-5D-5L recorded a  
101 mean health-state value of 0.78 for Deaf people compared to the mean health-state value  
102 for the general population of a similar age of 0.84 [10]. Common mental health problems  
103 have been found to be more prevalent amongst Deaf people in comparison with the hearing  
104 population [6]. Additionally, Deaf people are more likely to be victims of physical, sexual,  
105 and emotional abuse along with neglect, all of which are significant risk factors for poor  
106 mental health [11, 12]. Wide-spread difficulties in accessing health-related information in a  
107 signed language, accessing health care in a timely manner, cultural-linguistic barriers in  
108 interactions with clinicians and health care providers, and inappropriate diagnostic

109 assessments normed on hearing populations have all been recorded as potential  
110 contributors to poorer health outcomes in this population [13, 7, 14].  
111 However, a comprehensive systematic review of the evidence concerning the physical and  
112 mental health outcomes of signing Deaf adult populations has yet to be undertaken.  
113 PROSPERO records a current systematic review of Inequities Experienced by Deaf and Hard  
114 of Hearing Patients in Healthcare Access and Healthcare Delivery [CRD42020161691] and  
115 one concerning the prevalence and correlates of mental and neurodevelopmental  
116 symptoms and disorders among deaf children and adolescents [CRD42020189403]. Neither  
117 addresses health and mental health outcomes of Deaf signing adults which is required as a  
118 guide to future research and to assist clinicians in their current work.

#### 119 **Research questions:**

- 120 • What does the available literature conclude about the mental and physical health of  
121 adult Deaf population(s)?
  - 122 ○ How does the health of the Deaf population(s) compare to that of the general  
123 population(s)?
  - 124 ○ What are the strengths and weaknesses of the available literature?
  - 125 ○ What should future research aim to address?

#### 126 **METHODS**

##### 127 **Original protocol for the study:**

128 Prospero registration:

129 [https://www.crd.york.ac.uk/prospero/display\\_record.php?RecordID=182609](https://www.crd.york.ac.uk/prospero/display_record.php?RecordID=182609)

##### 130 **Eligibility criteria**

131 An electronic literature search was used to identify relevant studies up to (13<sup>th</sup> June 2023).

132 No starting cut-off date was applied. The following electronic databases were searched

133 using the OVID platform: Medline; Embase; PsychINFO; and Web of Science. The research  
 134 strategy included the keywords (e.g. deaf\*, health\*, and sign\*) and the key terms were  
 135 truncated and combined through use of the Boolean operators ‘AND’ and ‘OR’ (see online  
 136 supplementary table S1).

137 Articles identified by the search underwent a two-step screening process. Each stage of the  
 138 review was completed independently by two reviewers ([AUTHOR ONE] & [AUTHOR TWO]),  
 139 with a third reviewer ([AUTHOR FIVE]) consulted to settle any disagreements. Firstly,  
 140 publication titles and abstracts were screened for relevance using the inclusion and  
 141 exclusion criteria, defined prior to searching (see Table 1). The papers that met these  
 142 criteria were then screened by a full paper review, again using the predefined eligibility  
 143 criteria.

144 Table 1. Inclusion and exclusion criteria

| Aspect of study | Inclusion                                                                                                                                                                                                                            | Exclusion                                                                                                                                                                                                                                                                                                                                                                                                                                                                                                                                                                              |
|-----------------|--------------------------------------------------------------------------------------------------------------------------------------------------------------------------------------------------------------------------------------|----------------------------------------------------------------------------------------------------------------------------------------------------------------------------------------------------------------------------------------------------------------------------------------------------------------------------------------------------------------------------------------------------------------------------------------------------------------------------------------------------------------------------------------------------------------------------------------|
| Population      | <ul style="list-style-type: none"> <li>• Signing Deaf populations*</li> <li>• Adults (aged 18+)</li> <li>• Studies focusing on a subgroup of Deaf populations (e.g. LGBTQ, those with learning disabilities/difficulties)</li> </ul> | <ul style="list-style-type: none"> <li>• deaf populations (with a lowercase ‘d’) and/or where deaf is not used to define those who are sign language users</li> <li>• Hard-of-hearing populations who are not sign language users</li> <li>• Children or adolescents</li> <li>• Those with single sided deafness</li> <li>• Individuals who are blind/ those with dual sensory impairment</li> <li>• Individuals with age-related hearing loss</li> <li>• Cochlear implant users who are not sign language users</li> <li>• Deaf people who use spoken language exclusively</li> </ul> |
| Study type      | <ul style="list-style-type: none"> <li>• All study types other than those in the exclusion criteria</li> <li>• Full text</li> <li>• Peer-reviewed</li> <li>• Primary or secondary peer reviewed research articles</li> </ul>         | <ul style="list-style-type: none"> <li>• Letters</li> <li>• Editorial/opinion pieces</li> <li>• Historical articles</li> <li>• Case reports</li> <li>• Conference abstracts</li> </ul>                                                                                                                                                                                                                                                                                                                                                                                                 |
| Outcomes        | <ul style="list-style-type: none"> <li>• Measures of mental health such as the prevalence of mental health conditions and measures used in relation to mental health (e.g., the PHQ-9 and GAD-7)</li> </ul>                          | <ul style="list-style-type: none"> <li>• Papers reporting on the physical or mental health of carers/relatives of Deaf individuals</li> <li>• Papers reporting on hearing health conditions including their aetiology and treatment</li> <li>• Papers reporting studies on audiology</li> </ul>                                                                                                                                                                                                                                                                                        |



| Aspect of study                                                                                                                                                                                                                                                                                                                                                                                                                                                                                                                                                      | Inclusion                                                                                                                                                                                                                                                                                                                                                               | Exclusion                                                                                                                                                                                                                                                                                                                                                                                                                                                                                |
|----------------------------------------------------------------------------------------------------------------------------------------------------------------------------------------------------------------------------------------------------------------------------------------------------------------------------------------------------------------------------------------------------------------------------------------------------------------------------------------------------------------------------------------------------------------------|-------------------------------------------------------------------------------------------------------------------------------------------------------------------------------------------------------------------------------------------------------------------------------------------------------------------------------------------------------------------------|------------------------------------------------------------------------------------------------------------------------------------------------------------------------------------------------------------------------------------------------------------------------------------------------------------------------------------------------------------------------------------------------------------------------------------------------------------------------------------------|
|                                                                                                                                                                                                                                                                                                                                                                                                                                                                                                                                                                      | <ul style="list-style-type: none"> <li>Measures of physical health, such as the prevalence of chronic conditions and symptom measures for physical health conditions</li> <li>Measures of overall health status, quality of life and wellbeing, that may reflect mental and physical health combined</li> <li>Morbidity, mortality and prevalence statistics</li> </ul> | <ul style="list-style-type: none"> <li>Papers reporting on correction or improvement to hearing</li> <li>Papers reporting on health measurement instruments (such as questionnaire validation studies) without data on health status.</li> <li>Papers reporting on barriers to health care or health delivery to Deaf populations that exclude any health outcome data</li> <li>Papers reporting on health risk behaviours unless containing data on specific health outcomes</li> </ul> |
| Country                                                                                                                                                                                                                                                                                                                                                                                                                                                                                                                                                              | No restriction by country                                                                                                                                                                                                                                                                                                                                               |                                                                                                                                                                                                                                                                                                                                                                                                                                                                                          |
| Language                                                                                                                                                                                                                                                                                                                                                                                                                                                                                                                                                             | Research articles not published in English language nor a signed language                                                                                                                                                                                                                                                                                               |                                                                                                                                                                                                                                                                                                                                                                                                                                                                                          |
| Timeframe                                                                                                                                                                                                                                                                                                                                                                                                                                                                                                                                                            | Up until 13 <sup>th</sup> June 2023                                                                                                                                                                                                                                                                                                                                     |                                                                                                                                                                                                                                                                                                                                                                                                                                                                                          |
| <p>* Signing Deaf populations are defined using a sociological/cultural-linguistic definition, referring to a particular group, not defined by the audiological condition of not hearing, but rather those who use a signed language as their first or preferred language– and share a culture. There is not one global population but signing Deaf populations exist in each country.<br/>           Abbreviations: GAD-7, Generalised Anxiety Disorder assessment-7; PHQ-9, Patient Health Questionnaire-9; LGBTQ, Lesbian Gay Bisexual Transgender and Queer.</p> |                                                                                                                                                                                                                                                                                                                                                                         |                                                                                                                                                                                                                                                                                                                                                                                                                                                                                          |

145

146 **Data extraction**

147 Comprehensive data extraction was performed using a pre-specified data extraction tool  
 148 based on the Cochrane data collection form ([Collecting data - form for RCTs and non-RCTs](#))  
 149 and additional data extraction criteria to accommodate a range of study designs. This  
 150 included extracting information on study samples, methodology, limitations, evidence gaps,  
 151 results, and a quality assessment for critical appraisal. Three reviewers ([AUTHORS ONE,  
 152 TWO, and THREE]) extracted data independently. Results were then compared and  
 153 discussed, with any disagreements settled between them and an additional reviewer  
 154 ([AUTHOR FIVE]).

155 **Quality assessment**

156 The CASP Cohort Study checklist (<https://casp-uk.net/casp-tools-checklists/>) was used to  
 157 assess bias in each study as it was more appropriate to the range of items than other more  
 158 design-specific checklists in the CASP suite. Two reviewers ([AUTHORS ONE AND TWO])

159 independently assessed the risk of bias, with quality checks performed on 25% of the  
160 extracted papers by a third reviewer ([AUTHOR FIVE]), to ensure consistency. Results were  
161 compared with any disagreements resolved by a third reviewer.

## 162 **RESULTS**

163 Screening outcomes are presented in Figure 1.

164 [INSERT Figure 1: PRISMA flow diagram: the findings from the searches.]

### 165 **Study characteristics**

166 All 35 items included were peer review journal articles of which 27 reported primary data  
167 and 8 were secondary data analyses. 29 studies utilised self-report health data. The  
168 identified publications varied by research setting and sample size. 32 out of the 35 studies  
169 took place in economically well resourced, developed countries, 2 from low- and middle-  
170 income countries and 1 from least developed countries. Only one study involved a  
171 randomised controlled trial.

172 Of the 35 studies, 26 used comparator populations in their study designs. Of these, 19 used  
173 comparisons with the “general population”. This was not always distinguished to mean the  
174 hearing population. For example, the general population could include people who had a  
175 hearing loss but were not signing Deaf people. Comparators were either general population  
176 reference data for a particular disease, or general population survey study samples (e.g.  
177 Health Survey of England data). Three studies [15, 16, 17] used external datasets from the  
178 general population to construct a comparison group that were to some degree matched for  
179 a range of demographic variables (e.g. age and gender). Eight studies sought comparative  
180 data between d/Deaf populations. For example, Deaf sign language users versus other deaf  
181 people who used spoken language or within Deaf communities whereby Deaf people were  
182 distinguished by intersecting characteristics such as ethnicity or sexuality.

183 **Study appraisal**

184 Quality appraisal by study is shown in Table 2. Application of the two initial screening  
 185 questions in CASP resulted in 28 of 35 studies being eligible for quality appraisal with tool.  
 186 No studies met all the CASP criteria. Comments on the strengths/weaknesses of studies are  
 187 incorporated in the presentation of health outcome data below.

188 Table 2. CASP study appraisal for each included in the review. Y = yes, CT = Can't tell, N = no.

189 Note: CASP criterion 7 reports the results and is excluded here as they are included in the main text. In the  
 190 CASP criterion 8 (precise) Y indicates Confidence Intervals (CIs) were reported, and N that they were not.

| Author(s) (year)                 | CASP criterion |    |    |    |      |      |      |      |             |    |    |    |    |
|----------------------------------|----------------|----|----|----|------|------|------|------|-------------|----|----|----|----|
|                                  | 1              | 2  | 3  | 4  | 5(a) | 5(b) | 6(a) | 6(b) | 8 (precise) | 9  | 10 | 11 | 12 |
| Ammons et al (2020) [37]         | Y              | CT | Y  | Y  | Y    | Y    | Y    | Y    | N           | CT | CT | Y  | Y  |
| Anderson et al (2021) [33]       | Y              | Y  | Y  | Y  | CT   | Y    | Y    | Y    | N           | CT | CT | CT | Y  |
| Barnett et al (2011) [9]         | Y              | Y  | Y  | Y  | Y    | CT   | CT   | CT   | Y           | Y  | N  | Y  | Y  |
| Barnett et al (2016) [28]        | Y              | Y  | Y  | Y  | Y    | N    | CT   | Y    | Y           | CT | N  | CT | Y  |
| Barnett et al (2023) [44]        | Y              | Y  | Y  | Y  | Y    | Y    | Y    | Y    | Y           | Y  | CT | Y  | Y  |
| Belk et al (2016) [43]           | Y              | Y  | Y  | Y  | Y    | N    | Y    | Y    | N           | CT | Y  | CT | Y  |
| Chapman et al (2017) [35]        | Y              | Y  | Y  | CT | Y    | Y    | Y    | Y    | N           | Y  | Y  | CT | Y  |
| Crowe et al (2016) [59]          | Y              | CT | CT | CT | CT   | N    | CT   | Y    | N           | CT | N  | CT | CT |
| Druel et al (2018) [18]          | Y              | Y  | Y  | Y  | CT   | Y    | Y    | Y    | N           | Y  | Y  | Y  | Y  |
| Duarte et al (2021) [38]         | Y              | Y  | Y  | Y  | Y    | Y    | CT   | Y    | Y           | Y  | Y  | Y  | Y  |
| Ehn et al (2018) [15]            | Y              | Y  | Y  | Y  | CT   | CT   | Y    | Y    | Y           | Y  | Y  | Y  | Y  |
| Emond et al (2015) [8]           | Y              | Y  | Y  | Y  | CT   | CT   | Y    | Y    | N           | Y  | Y  | Y  | N  |
| Fellinger et al (2005) [30]      | Y              | Y  | N  | CT | Y    | CT   | Y    | Y    | N           | N  | CT | Y  | Y  |
| Henning et al (2011) [31]        | Y              | CT | CT | Y  | Y    | Y    | Y    | Y    | N           | Y  | CT | Y  | Y  |
| Horton (2010) [60]               | Y              | CT | Y  | Y  | Y    | Y    | Y    | Y    | N           | Y  | CT | Y  | Y  |
| James et al (2022) [19]          | Y              | Y  | Y  | Y  | Y    | CT   | Y    | Y    | Y           | CT | CT | Y  | Y  |
| James et al (2022) [25]          | Y              | Y  | Y  | CT | Y    | Y    | Y    | Y    | Y           | CT | Y  | Y  | Y  |
| Kushalnagar et al (2019) [32]    | Y              | Y  | CT | CT | Y    | Y    | Y    | Y    | Y           | Y  | Y  | CT | Y  |
| Kushalnagar et al (2019) [20]    | Y              | Y  | Y  | Y  | Y    | Y    | Y    | Y    | Y           | Y  | Y  | CT | Y  |
| Kushalnager et al (2020) [39]    | Y              | Y  | Y  | Y  | Y    | Y    | Y    | Y    | Y           | Y  | Y  | CT | Y  |
| Kvam et al (2007) [21]           | Y              | Y  | Y  | CT | Y    | Y    | Y    | Y    | Y           | CT | Y  | Y  | CT |
| McKee et al (2014) [36]          | Y              | Y  | Y  | CT | Y    | Y    | Y    | Y    | Y           | Y  | CT | Y  | Y  |
| Munro et al (2009) [41]          | Y              | CT | Y  | CT | N    | N    | Y    | Y    | Y           | Y  | CT | Y  | Y  |
| Øhre et al (2017) [40]           | Y              | Y  | Y  | CT | Y    | N    | CT   | CT   | N           | CT | CT | Y  | Y  |
| Peñacoba et al (2020) [16]       | Y              | Y  | Y  | N  | Y    | Y    | Y    | Y    | Y           | Y  | Y  | Y  | Y  |
| Perrodin-Njoku et al (2022) [17] | Y              | Y  | Y  | CT | Y    | CT   | Y    | Y    | Y           | Y  | Y  | CT | Y  |
| Rogers et al (2013) [42]         | Y              | CT | Y  | Y  | Y    | N    | Y    | Y    | N           | Y  | CT | CT | Y  |
| Rogers et al (2016) [29]         | Y              | Y  | Y  | Y  | Y    | N    | Y    | Y    | Y           | Y  | N  | Y  | Y  |
| Rogers et al (2018) [23]         | Y              | Y  | Y  | Y  | Y    | N    | Y    | Y    | Y           | Y  | N  | CT | Y  |

|                                            |   |    |   |    |    |   |   |   |   |    |    |    |    |
|--------------------------------------------|---|----|---|----|----|---|---|---|---|----|----|----|----|
| <b>Sanfacon et al (2021) [34]</b>          | Y | Y  | Y | Y  | Y  | Y | Y | Y | Y | Y  | Y  | CT | Y  |
| <b>Shields et al (2020) [10]</b>           | Y | Y  | Y | Y  | Y  | Y | Y | Y | Y | Y  | CT | Y  | Y  |
| <b>Simons et al (2018) [24]</b>            | Y | Y  | Y | Y  | Y  | Y | Y | Y | Y | Y  | Y  | N  | Y  |
| <b>Vichayanrat et al (2014) [26]</b>       | Y | CT | Y | CT | Y  | Y | Y | Y | N | CT | CT | N  | Y  |
| <b>Wahlqvist et al (2016) [27]</b>         | Y | Y  | Y | CT | Y  | Y | Y | Y | Y | CT | Y  | Y  | CT |
| <b>Werngren-Elgström et al (2003) [22]</b> | Y | Y  | Y | Y  | CT | N | Y | Y | N | Y  | CT | CT | Y  |

191

192 **Health conditions studied**

193 The coverage of health conditions represented in the included articles is described  
 194 according to the International Classification of Diseases 11<sup>th</sup> Revision (ICD-11) with some  
 195 studies encompassing more than one of the 26 main categories. 15 out of the 26  
 196 classifications are encompassed within the 35 included studies. The greatest number of  
 197 studies (25 out of 35) concern ICD-11 Code 6 Mental, Behavioural or Neurodevelopmental  
 198 disorders. This includes anxiety/depression, mental well-being, psychiatric disorder, mental  
 199 distress, and schizophrenia (See Table 3). The remaining 11 classifications where there are  
 200 no outcome studies identified are: 01 Certain infectious or parasitic; 03 Diseases of the  
 201 blood or blood-forming organs; 04 Diseases of the immune system; 08 Diseases of the  
 202 nervous system; 09 Diseases of the visual system; 10 Diseases of the ear or mastoid process;  
 203 14 Diseases of the skin; 17 Conditions related to sexual health; 19 Certain conditions  
 204 originating in the perinatal period; 25 Codes for special purposes; and 26 Supplementary  
 205 Chapter Traditional Medicine Conditions - Module I.

206 Table 3. Reported health outcomes in the included studies by ICD-11 main classification code.

| ICD-11 Code                   | Health outcome | Studies                                                                                                                                                                                        |
|-------------------------------|----------------|------------------------------------------------------------------------------------------------------------------------------------------------------------------------------------------------|
| 02 Neoplasms                  | Cancer         | <b>Druel et al (2018) [18]</b><br><b>Kushalnagar et al (2019) [32]</b><br><b>Kushalnagar et al (2020) [39]</b><br><b>Perrodin-Njoku et al (2022) [17]</b><br><b>Sanfacon et al (2021) [34]</b> |
| 05 Endocrine, nutritional, or | Obesity        | <b>Barnett et al (2011) [9]</b><br><b>Barnett et al (2023) [44]</b>                                                                                                                            |

|                                                         |                                                                                                                                     |                                                                                                                                                                                                                                                                                                                                                          |
|---------------------------------------------------------|-------------------------------------------------------------------------------------------------------------------------------------|----------------------------------------------------------------------------------------------------------------------------------------------------------------------------------------------------------------------------------------------------------------------------------------------------------------------------------------------------------|
| metabolic diseases                                      |                                                                                                                                     | <b>Emond et al (2015) [8]<br/>James et al (2022) [19]<br/>Perrodin-Njoku et al (2022) [17]</b>                                                                                                                                                                                                                                                           |
|                                                         | Cholesterol                                                                                                                         | <b>Barnett et al (2023) [44]<br/>Emond et al (2015) [8]</b>                                                                                                                                                                                                                                                                                              |
|                                                         | Diabetes                                                                                                                            | <b>Barnett et al (2023) [44]<br/>Emond et al (2015) [8]<br/>Kushalnagar et al (2020) [39]<br/>Perrodin-Njoku et al (2022) [17]<br/>Sanfacon et al (2021) [34]</b>                                                                                                                                                                                        |
|                                                         | Metabolism symptoms - feeling cold/overweight/etc.                                                                                  | <b>Werngren-Elgström et al (2003) [22]</b>                                                                                                                                                                                                                                                                                                               |
| 06 Mental, behavioural, or neurodevelopmental disorders | Perinatal depression                                                                                                                | <b>Anderson et al (2021) [33]</b>                                                                                                                                                                                                                                                                                                                        |
|                                                         | Depression / Anxiety                                                                                                                | <b>Belk et al (2016) [43]<br/>Barnett et al (2023) [44]<br/>James et al (2022) [25]<br/>Kushalnagar et al (2019) [32]<br/>Kushalnagar et al (2019) [20]<br/>Kushalnagar et al (2020) [39]<br/>Kvam et al (2007) [21]<br/>Peñacoba et al (2020) [16]<br/>Perrodin-Njoku et al (2022) [17]<br/>Rogers et al (2013) [42]<br/>Sanfacon et al (2021) [34]</b> |
|                                                         | Depression                                                                                                                          | <b>Emond et al (2015) [8]<br/>James et al (2022) [19]<br/>Werngren-Elgström et al (2003) [22]</b>                                                                                                                                                                                                                                                        |
|                                                         | Mental well-being                                                                                                                   | <b>Chapman et al (2017) [35]<br/>Munro et al (2009) [41]<br/>Peñacoba et al (2020) [16]<br/>Rogers et al (2018) [23]</b>                                                                                                                                                                                                                                 |
|                                                         | Psychiatric disturbance / RAMH - info inc. Mental health needs                                                                      | <b>Crowe et al (2016) [59]</b>                                                                                                                                                                                                                                                                                                                           |
|                                                         | HET questionnaire – Psychological health problems                                                                                   | <b>Ehn et al (2018) [15]</b>                                                                                                                                                                                                                                                                                                                             |
|                                                         | Psychiatric disorder / Psychopathology                                                                                              | <b>Fellinger et al (2005) [30]</b>                                                                                                                                                                                                                                                                                                                       |
|                                                         | Schizophrenia                                                                                                                       | <b>Horton (2010) [60]</b>                                                                                                                                                                                                                                                                                                                                |
|                                                         | Mental distress / Distress / Functioning                                                                                            | <b>Øhre et al (2017) [40]</b>                                                                                                                                                                                                                                                                                                                            |
|                                                         | Global distress                                                                                                                     | <b>Shields et al (2020) [10]</b>                                                                                                                                                                                                                                                                                                                         |
|                                                         | Mental health (including fatigue / loss of confidence / constant tension / worthlessness / not facing up to problems / unhappiness) | <b>Wahlqvist et al (2016) [27]</b>                                                                                                                                                                                                                                                                                                                       |
| 07 Sleep-wake disorders                                 | Insomnia                                                                                                                            | <b>Werngren-Elgström et al (2003) [22]</b>                                                                                                                                                                                                                                                                                                               |
|                                                         | Hypertension / Blood pressure                                                                                                       | <b>Barnett et al (2023) [44]<br/>Emond et al (2015) [8]<br/>Kushalnagar et al (2020) [39]</b>                                                                                                                                                                                                                                                            |

|                                                                        |                                                                                                                                                                                     |                                                                                                                                                                                                                                                                               |
|------------------------------------------------------------------------|-------------------------------------------------------------------------------------------------------------------------------------------------------------------------------------|-------------------------------------------------------------------------------------------------------------------------------------------------------------------------------------------------------------------------------------------------------------------------------|
| 11 Diseases of the circulatory system                                  |                                                                                                                                                                                     | <b>Perrodin-Njoku et al (2022) [17]</b><br><b>Sanfacon et al (2021) [34]</b><br><b>Simons et al (2018) [24]</b>                                                                                                                                                               |
|                                                                        | Cardiovascular disease                                                                                                                                                              | <b>Barnett et al (2023) [44]</b><br><b>Emond et al (2015) [8]</b><br><b>Kushalnagar et al (2020) [39]</b><br><b>McKee et al (2014) [36]</b><br><b>Sanfacon et al (2021) [34]</b>                                                                                              |
| 12 Diseases of the respiratory system                                  | Respiratory conditions                                                                                                                                                              | <b>Emond et al (2015) [8]</b><br><b>James et al (2022) [25]</b><br><b>Kushalnagar et al (2019) [32]</b><br><b>Kushalnagar et al (2020) [39]</b><br><b>Perrodin-Njoku et al (2022) [17]</b><br><b>Sanfacon et al (2021) [34]</b><br><b>Werngren-Elgström et al (2003) [22]</b> |
| 13 Diseases of the digestive system                                    | Oral health                                                                                                                                                                         | <b>Vichayanrat et al (2014) [26]</b>                                                                                                                                                                                                                                          |
| 15 Diseases of the musculoskeletal system or connective tissue         | Arthritis                                                                                                                                                                           | <b>Kushalnagar et al (2019) [32]</b><br><b>Perrodin-Njoku et al (2022) [17]</b><br><b>Sanfacon et al (2021) [34]</b>                                                                                                                                                          |
|                                                                        | Musculo-skeletal symptoms                                                                                                                                                           | <b>Werngren-Elgström et al (2003) [22]</b>                                                                                                                                                                                                                                    |
|                                                                        | Spondylosis / intervertebral disc disorders / other back problems                                                                                                                   | <b>James et al (2022) [25]</b>                                                                                                                                                                                                                                                |
| 16 Diseases of the genitourinary system                                | Gastrointestinal-urinary tract symptoms                                                                                                                                             | <b>Werngren-Elgström et al (2003) [22]</b>                                                                                                                                                                                                                                    |
| 18 Pregnancy, childbirth, or the puerperium                            | Other complications of pregnancy / haemorrhage during pregnancy / abruptio placenta / placenta previa / other complications of birth / spontaneous abortion                         | <b>James et al (2022) [25]</b>                                                                                                                                                                                                                                                |
| 20 Developmental anomalies                                             | Usher syndrome type 1                                                                                                                                                               | <b>Ehn et al (2018) [15]</b><br><b>Wahlqvist et al (2016)</b>                                                                                                                                                                                                                 |
| 21 Symptoms, signs, or clinical findings, not elsewhere classified     | Abdominal pain / Nonspecific chest pain                                                                                                                                             | <b>James et al (2022) [25]</b>                                                                                                                                                                                                                                                |
|                                                                        | Chronic comorbidity                                                                                                                                                                 | <b>Kushalnagar et al (2019) [32]</b><br><b>Kushalnagar et al (2019) [20]</b>                                                                                                                                                                                                  |
|                                                                        | Physical health: headache / tinnitus / hand, elbow, knee and leg pain                                                                                                               | <b>Wahlqvist et al (2016) [27]</b>                                                                                                                                                                                                                                            |
| 22 Injury, poisoning, or certain other consequences of external causes | Superficial injury / contusion / sprains and strains / open wounds of extremities / other injuries and conditions due to external causes / open wounds of the head, neck, and trunk | <b>James et al (2022) [25]</b>                                                                                                                                                                                                                                                |
| 23 External causes of morbidity or mortality                           | Suicide attempts / suicidal thoughts                                                                                                                                                | <b>Barnett et al (2011) [9]</b><br><b>Barnett et al (2016) [28]</b><br><b>Ehn et al (2018) [15]</b><br><b>James et al (2022) [25]</b><br><b>Wahlqvist et al (2016) [27]</b>                                                                                                   |

|                                                                      |                 |                                                                                                                                                |
|----------------------------------------------------------------------|-----------------|------------------------------------------------------------------------------------------------------------------------------------------------|
| 24 Factors influencing health status or contact with health services | Health status   | <b>Kushalnagar et al (2019) [20]</b><br><b>Rogers et al (2016) [29]</b><br><b>Rogers et al (2018) [23]</b><br><b>Shields et al (2020) [10]</b> |
|                                                                      | Quality of life | <b>Ammons et al (2016) [37]</b><br><b>Duarte et al (2021) [38]</b><br><b>Fellinger et al (2005) [30]</b><br><b>Henning et al (2011) [31]</b>   |

207

208 **Health Outcomes in comparison with hearing/general populations**

209 Table 4. Overview of health outcomes in comparison with hearing / general populations

| Health outcome         | Signing Deaf populations in comparisons with hearing/general population samples                                                                                                                                                                                                                                                                                                       |
|------------------------|---------------------------------------------------------------------------------------------------------------------------------------------------------------------------------------------------------------------------------------------------------------------------------------------------------------------------------------------------------------------------------------|
| Cancer                 | <ul style="list-style-type: none"> <li>Diagnosed at a more advanced stage (Druel et al., 2018) [18].</li> <li>Higher risk of cancer overall for Black Deaf people when compared with the general Black population (Perrodin-Njoku et al., 2022) [17].</li> </ul>                                                                                                                      |
| Obesity                | <ul style="list-style-type: none"> <li>Increased prevalence (Barnett et al., 2011; Emond et al., 2015) [9, 8].</li> <li>No difference in weight/obesity prevalence (James et al., 2022; Perrodin-Njoku et al., 2022) [19, 17].</li> </ul>                                                                                                                                             |
| Cholesterol            | <ul style="list-style-type: none"> <li>'Considerably' lower than the general population reference data (Emond et al., 2015) [8].</li> </ul>                                                                                                                                                                                                                                           |
| Diabetes               | <ul style="list-style-type: none"> <li>Similar prevalence to the general population (Emond et al., 2015) [8] but more likely to be uncontrolled.</li> <li>Higher prevalence amongst Black Deaf people when compared to Black hearing people (Perrodin-Njoku et al., 2022) [17].</li> </ul>                                                                                            |
| Depression / Anxiety   | <ul style="list-style-type: none"> <li>Prevalence of anxiety/depression is higher in Deaf adults (Kushalnagar et al., 2019; Kvam et al., 2007; Peñacoba et al., 2020) [20, 21, 16] and depression in older Deaf adults (Wengren-Elgström et al., 2003) [22].</li> <li>No difference amongst Black Deaf people and Black hearing people (Perrodin-Njoku et al., 2022) [17].</li> </ul> |
| Mental well-being      | <ul style="list-style-type: none"> <li>Deaf adults scored significantly lower (Peñacoba et al., 2020; Rogers et al., 2018) [16, 23].</li> </ul>                                                                                                                                                                                                                                       |
| Hypertension           | <ul style="list-style-type: none"> <li>Higher blood pressure (Emond et al., 2015; Perrodin-Njoku et al., 2022) [8, 17].</li> <li>Lower prevalence of high blood pressure (Simons et al., 2018) [24].</li> </ul>                                                                                                                                                                       |
| Cardiovascular disease | <ul style="list-style-type: none"> <li>Lower prevalence reported (Emond et al., 2015) [8].</li> </ul>                                                                                                                                                                                                                                                                                 |
| Respiratory conditions | <ul style="list-style-type: none"> <li>Lower prevalence reported of COPD (Emond et al., 2015) [8].</li> </ul>                                                                                                                                                                                                                                                                         |
| Lung condition         | <ul style="list-style-type: none"> <li>Black Deaf people have greater likelihood of developing a lung condition when compared with Black hearing people (Perrodin-Njoku et al., 2022) [17].</li> </ul>                                                                                                                                                                                |
| Oral health            | <ul style="list-style-type: none"> <li>No difference in oral hygiene status, prevalence of cavities or DMHFT (Decayed, Missing and Filled Teeth) (Vichayanrat et al., 2014) [26].</li> </ul>                                                                                                                                                                                          |
| Arthritis              | <ul style="list-style-type: none"> <li>No significant difference in prevalence amongst Black Deaf people when compared with Black hearing people (Perrodin-Njoku et al., 2022) [17].</li> </ul>                                                                                                                                                                                       |



| Health outcome                          | Signing Deaf populations in comparisons with hearing/general population samples                                                                                                                                                                                                |
|-----------------------------------------|--------------------------------------------------------------------------------------------------------------------------------------------------------------------------------------------------------------------------------------------------------------------------------|
| Chronic comorbidity                     | <ul style="list-style-type: none"> <li>Fewer co-morbidities reported in Deaf people (Kushalnagar et al., 2019) [20].</li> </ul>                                                                                                                                                |
| Headache                                | <ul style="list-style-type: none"> <li>More prevalence for Deaf people with USH1 (Wahlqvist et al., 2016) [27].</li> </ul>                                                                                                                                                     |
| Suicide attempts / suicidal thoughts    | <ul style="list-style-type: none"> <li>Higher prevalence of attempts (Barnett et al., 2011; Barnett et al., 2016) [9, 28].</li> <li>Deaf people with Usher Syndrome Type 1 were more likely to attempt suicide (Ehn et al., 2018; Wahlqvist et al., 2016) [15, 27].</li> </ul> |
| Health status                           | <ul style="list-style-type: none"> <li>Poorer health status amongst Deaf people (Kushalnagar et al., 2019; Rogers et al., 2016; and Shields et al., 2020) [20, 29, 10].</li> </ul>                                                                                             |
| Quality of Life                         | <ul style="list-style-type: none"> <li>Lower quality of life (Fellinger et al., 2005; Henning et al., 2011) [30, 31].</li> </ul>                                                                                                                                               |
| Musculo-skeletal symptom                | <ul style="list-style-type: none"> <li>Fewer reports of emergency department encounters for spondylosis, intervertebral disc disorders, and other back problems (James et al., 2022) [25].</li> </ul>                                                                          |
| Pregnancy, childbirth or the puerperium | <ul style="list-style-type: none"> <li>Fewer reports of emergency department encounters for complications during pregnancy (James et al., 2022) [25].</li> </ul>                                                                                                               |

210

211 **Cancer**

212 A large-scale study [18] involving secondary data from medical records of Deaf cancer  
 213 patients found that Deaf people were diagnosed at a more advanced stage of colorectal and  
 214 prostate cancer (64% of the Deaf group vs 13% of the reference group for prostate cancer,  
 215 and 100% of the Deaf people were diagnosed at stage III/IV vs 47% for the reference group  
 216 for colorectal cancer). The Deaf group had larger tumours at the time of diagnosis and their  
 217 cancers were more likely to have spread to lymph nodes or metastasised to other organs.  
 218 Deaf people were also more likely to be diagnosed with larger tumours in breast cancers  
 219 (T2+ size was 60% for Deaf people compared to the reference group 34%) which is related  
 220 to poorer prognosis, although there was no difference in the metastatic spread between the  
 221 groups [18]. In an age-matched large-scale study, Perrodin-Njoku et al [17] found that Black  
 222 Deaf people were more likely to have cancer overall compared to Black hearing people  
 223 (OR=3.53, CI 1.61-7.71).

224 **Obesity**



225 Two primary studies [9, 8] recruiting 339 and 298 respectively reported significantly higher  
226 rates of overweight/obesity among Deaf populations when compared to published data on  
227 general populations: 35% of Deaf adults vs 26.6% of adults in the US general population [9]  
228 and 72% of Deaf men and 71% of Deaf women were overweight or obese vs 65% of men  
229 and 58% of women in the general population in the UK [8] HSE dataset. In the Emond et al.  
230 study [8], 90% of the over 65 Deaf group were overweight or obese. Neither a small-scale  
231 patient record study (n=92) [19] nor a case-matched comparator study in Black populations  
232 [17] reported any significant differences. However, differences in the mean age of the  
233 comparator groups was noted for both studies which could help to explain the non-  
234 significant findings.

### 235 ***Cholesterol***

236 Emond et al. [8] found that the mean level for both males and females was ‘considerably’  
237 lower compared to general population Health Survey of England (HSE) reference data [8]  
238 although it was not clear whether the reported difference is statistically significant or not.  
239 No potential co-variates were examined.

### 240 ***Diabetes***

241 Edmond et al. [8] found that of those Deaf people who reported diabetes, at least half of  
242 the participants’ diabetes was not under control, which could lead to higher rates of diabetic  
243 complications. Perrodin-Njoku et al. [17] reported that Black Deaf people are more likely to  
244 have diabetes compared to Black hearing people in the US (OR=1.77, CI = 1.04-3.02). The  
245 type of diabetes was not reported in either study.

### 246 ***Depression / Anxiety***

247 The prevalence of depression / anxiety in Deaf adults was found to be significantly higher  
248 compared with the hearing population. A large-scale study (n=1,704) by Kushalnagar et al.

249 [20] reported 24.9% compared with 21.7% and that it occurred at an earlier age; Kvam et al.’  
250 Norwegian population study [21] reported 33.8% compared with 6.8%; Peñacoba et al. [16]  
251 reported mean scores for anxiety of 8.06 compared with 6.60 and for depression 5.01  
252 compared with 3.27 in a case-matched study of Spanish Deaf and hearing adults. Perodddin-  
253 Njoku et al [17] reported no difference in the Black Deaf population compared to the Black  
254 hearing population, they stated that the issue of medical mistrust in the general Black  
255 community might be a factor in finding no difference between the two groups. Werngren-  
256 Elgström et al. [22] in a small Swedish comparative study (n=45) found that Deaf people  
257 aged 65 and over have a higher prevalence of depression compared to their hearing  
258 counterparts (37% vs 23%).

### 259 ***Mental well-being***

260 A case-matched study of Spanish Deaf adults (n=146) reported significantly lower  
261 psychological well-being compared to Spanish hearing people: mean score of 24.58 vs 27.44  
262 [16]. Rogers et al. [23] small scale validation study reported a non -significant lower well-  
263 being mean score on the SWEMWBS (22.82) in comparison with the general population  
264 (23.64).

### 265 ***Hypertension***

266 The frequency of raised blood pressure was significantly higher for Deaf people (37%)  
267 compared to the HSE data (21%) although the confidence interval was not reported [8].  
268 Perrodin-Njoku et al. [17] also reported that Black Deaf people are more likely to experience  
269 higher blood pressure compared to the Black hearing population (OR=1.73). However, a  
270 large-scale study (n=532) by Simons et al. [24] reported that the prevalence for  
271 hypertension was significantly lower in the Deaf sample (33%) compared with 46% in the  
272 hearing sample.

273 ***Cardiovascular disease***

274 Cardiovascular disease was significantly less self-reported by Deaf people compared to the  
275 general population [8]. Emond et al. [8] found that treatment rate for Deaf men of all CVD  
276 was 45% compared with treatment rate for ischaemic heart disease and stroke of between  
277 61% and 70% for men age aged 55-84 in the general population.

278 ***Respiratory / lung conditions***

279 Self-reported Chronic Obstructive Pulmonary Disease (COPD) was less in Deaf adults (1%)  
280 compared to the HSE data (4% of men and 5% of women) [8] although the significant  
281 difference was not stated. Black Deaf people have a greater likelihood of developing a lung  
282 condition compared with Black hearing people (OR=1.72) [17]. Fewer DHH ASL users were  
283 reported in emergency department encounters for lower respiratory disease compared to  
284 DHH English speakers and hearing English speakers (n=11 vs n=62 and n=29 respectively)  
285 [25].

286 ***Oral health***

287 Vichayanrat et al. [26] reported no differences between Deaf and hearing people in  
288 prevalence of caries or DMFT (Decayed, Missing or Filled Teeth), and similar oral hygiene  
289 status. Those Deaf people who took part in Vichayanrat et al. [26] study were educated at  
290 BA and/or Diploma level, therefore, unlikely to be representative of the Deaf population.

291 ***Arthritis***

292 A self-report study by Perrodin-Njoku et al. [17] found no significant difference in  
293 prevalence of arthritis between Black Deaf people and Black hearing people.

294 ***Musculo-skeletal symptom***

295 James et al. [25] found that reporting of emergency department encounters for spondylosis,  
296 intervertebral disc disorders, and other back problems, was less for DHH ASL users (n=19) in  
297 comparison with DHH English speakers (n=56) and hearing English speakers.

### 298 ***Pregnancy, childbirth or the puerperium***

299 Of the 32 encounters recorded in emergency department records for other complications of  
300 pregnancy James et al. [25], only 3 were DHH ASL users compared with 25 DHH English and  
301 4 hearing English speakers.

### 302 ***Headache***

303 A secondary data study by Wahlqvist et al. [27] reported that Deaf people with USH1 (n=60)  
304 expressed significantly more prevalent problems with headaches compared to the cross  
305 section of the Swedish population including those with and without visual difficulties  
306 (n=5738) (40% vs 26% respectively).

### 307 ***Chronic comorbidity***

308 Kushalnagar et al. [20] reported that the hearing sample has more individuals with  
309 comorbidities compared to the Deaf sample (40.5% vs 34.2%), although the hearing sample  
310 was older than the Deaf sample which could explain the higher prevalence in the hearing  
311 sample.

### 312 ***Suicide attempts / suicidal thoughts***

313 The prevalence of suicide attempts in the past year is higher in the Deaf population (2.2%) in  
314 the US than observed in the general population (0.4%) [9] and Deaf people reported more  
315 suicide attempts in the past year compared with the general population (1.5% vs 0.5%) [28].  
316 Deaf people with Usher Syndrome Type 1 (USH1) are more likely to attempt suicide  
317 compared with the general population (16% vs 4%) [27]. James et al., [25] in a study of  
318 emergency department records report no suicide ideation and intentional self-inflicted

319 injury reported for DHH ASL users, in comparison with two were reported for DHH English  
320 speakers and three for hearing English speakers [25].

### 321 ***Health status***

322 Health status was found to be poorer in the Deaf population compared with the general  
323 population in the self-report studies by Rogers et al. [29] (EQ-5D mean index values 0.78 vs  
324 0.84), and Shields et al. [10] (43% vs 17% for depression symptoms). However, Kushalnagar  
325 et al. [20], found that hearing people had worse overall health status compared with Deaf  
326 people, suggesting that age may be a contributing factor, as the mean age of the hearing  
327 sample was significantly older than that of the Deaf adults. The Wahlqvist et al. [27] study  
328 reported that the USH1 group have greater problems with fatigue (62% versus 49%), and a  
329 loss of confidence (16% versus 6%) compared to the general population.

### 330 ***Quality of Life***

331 Fellingner et al. [30] and Henning et al. [31] both reported significantly lower Quality of Life  
332 as measured by WHOQOL-BREF in Deaf people compared with general populations. The use  
333 of the sign language version of WHOQOL-BREF was not reported in Fellingner et al. [30]  
334 study.

335

### 336 **Factors identified as influencing health outcomes within the Deaf population**

337 ***LGBTQ+ status:*** Kushalnagar et al. [32] found that the Deaf LGBTQ population in the US, in  
338 comparison with the Deaf non-LGBTQ population, are more likely to have a personal cancer  
339 history (24.1% vs 15.2%), more likely to have a lung condition (23.4% vs 15%), and  
340 significantly more likely to experience depression/anxiety (33.3% vs 17.9%). Deaf LGBTQ  
341 status was also significantly associated with increased risk for arthritis (RR=1.26) and for  
342 chronic comorbidity (2 or more medical conditions) (RR=1.25) [32] in comparison with the

343 Deaf non-LGBTQ population. A small-scale study (n=36) reported that the LGBTQ status  
344 were not significantly related to the depression score [33]. In a study involving transgender  
345 Deaf communities, it was found depression/anxiety was higher for those with nonbinary  
346 identities [34].

347 **Educational level:** Deaf people with university level education scored higher on  
348 psychological well-being compared with other Deaf people [16]. In another study,  
349 educational levels were found to be significant in explaining psychological well-being score  
350 [35]. A secondary data study found that Deaf people who reported low educational levels  
351 were more likely to be at risk for cardiovascular disease compared with Deaf people with a  
352 four-year college degree or more (OR=5.76) [36]. Two small-scale self-report studies [37,  
353 38] found that more years of education was significantly associated with higher quality of  
354 life for Deaf people.

355 **Employment and economic status:** Small-scale self-report study found that Deaf people  
356 who are not in employment have significantly lower mental well-being compared to those  
357 who are in employment (SWEMWBS BSL mean score 21.10 vs 23.40) [23]. Wahlqvist et al.  
358 [27] report those with USH1 who are in employment are more likely to attempt suicide  
359 compared to the general population who are in employment but those with USH1 who are  
360 not in employment the differences in suicidal thoughts are not significant compared to the  
361 non-working group in the general population [15]. Income status was reported not to have  
362 the presence of cardiovascular disease [36].

363 **Ethnicity:** Although some studies include race/ethnicity when describing the study samples,  
364 few studies have considered the influence of ethnicity on health outcomes. Perrodin-Njoku  
365 et al. [17] identified consistently poor health outcomes for Black Deaf adults with regard to  
366 diabetes, hypertension, heart condition, lung disease, and cancer, as well as comorbidity.

367 Anderson et al. [31] reported that individuals who identified as a racial/ethnic minority  
368 significantly had slightly higher levels of perinatal depression than those who identified as  
369 White non-Hispanic. Kushalnagar et al. [20] reported no significant difference in  
370 race/ethnicity on depression/anxiety outcomes.

371 **Gender/sex:** Health outcomes by gender/sex were explored in a few studies. Significantly  
372 poorer physical well-being outcomes were reported for Deaf females in the validated sign  
373 language version study (n=311) [38]. Poorer well-being / quality of life outcomes for Deaf  
374 females compared to Deaf males are found [8, 30, 21, 16, 23]. Kushalnagar et al. [20] higher  
375 prevalence of depression/anxiety amongst Deaf females. Deaf men were found to have  
376 significantly higher blood pressure (15.9%) compared to Deaf women (7.7%) [8].

377 **Language and communication:** Using inadequate access to direct child-caregiver  
378 communication in childhood as the independent variable, Kushalnagar et al. [39] identified  
379 that it increased a person's risks of having diabetes by 12%, hypertension by 10%, lung  
380 disease by 19% and cardiovascular disease by 61% and increased risk for  
381 depression/anxiety by 34% compared to those Deaf people who had adequate access to  
382 indirect family communication and inclusion [39]. No significant difference in the scores for  
383 mood or neurosis were found between those Deaf people who used sign language and deaf  
384 people who used spoken language [40].

385 **Family history/personal medical history:** Using the sign language version of the assessment  
386 and when the validation has been examined, Munro et al. [41] reported that a clinical  
387 sample had a significantly lower mean score for wellbeing (18.57; SD=9.6) compared with a  
388 non-clinical sample (27.04, SD=8.68) on the ORS-Auslan. Overall health status was found to  
389 be poorer for Deaf people with depression compared to those with no psychological distress  
390 or depression [10]. Rogers et al. [42] and Belk et al. [43] found that severity of depression

391 and anxiety was worse for those who self-reported as having mental health difficulties  
392 compared to those who did not.

393 **Age:** It was reported that diagnosis of depression/anxiety was likely to be young in the  
394 large-scale study [20], however the age was reported not to have impact on depression  
395 outcomes in Deaf populations in the study by Duarte et al. [38].

## 396 **DISCUSSION**

397 The findings from this systematic review demonstrate that, in general, physical health and  
398 mental health outcomes in Deaf signing populations are worse when compared with general  
399 population samples. Additionally, the impact of a health condition on other health  
400 outcomes can create further health inequalities, for example, although not a comparison  
401 to the general population, Barnett et al. [44] study which involved a whole sample who  
402 were overweight/obese (BMI of 25 or greater) and the biometric outcomes were recorded  
403 by a research nurse, 13.5% had diabetes, 37.5% had high blood pressure, 53.8% had high  
404 cholesterol, 2.9% had heart disease, 39.6% had a PHQ-9 score indicative of at least mild  
405 depression. However, the strength and quality of the evidence available is questionable.  
406 Firstly, sample definition is poor with inconsistencies in reporting which add to the  
407 difficulties in collating and appraising data concerning health outcomes for Deaf adults. The  
408 main issues include inaccurate or imprecise descriptions of participants meaning it is hard to  
409 discern in some studies who are Deaf sign language users and some study populations  
410 incorporated children and young people without any clear distinction from adults in data  
411 subsets. Secondly, some studies do not report whether the health outcomes measured used  
412 validated standard instruments in sign language nor report potential issues associated with  
413 interpreter-mediated assessment and engagement, particularly with regards to self-  
414 reported health data. Thirdly, secondary data analysis comparisons with 'general



415 population' data will include some participants who are deaf but not sign language users  
416 unless matched 'hearing' samples have been constructed. Fourthly, creating binary  
417 comparisons between Deaf sign language users and hearing/non-signing people can cover  
418 up issues of diversity and intersectionality within Deaf communities. Where comparison  
419 groups are matched on a range of demographic variables, these may still hide different  
420 circumstances associated with variables e.g. social determinants that are more prevalent  
421 amongst Deaf populations e.g. under-employment or direct discrimination.

422 Furthermore, gaps remain in the knowledge of specific health outcomes as there is no  
423 reported health outcome data for the Deaf population in 11 out of the 26 (42.3%) of the  
424 ICD-11 disease classification categories, including, for example, diseases of the immune  
425 system, visual system and nervous system which indicates clear deficits in health outcome  
426 data for this population. The bias towards studies concerning mental health might be in part  
427 explained by the longstanding development of specialist mental health services for deaf  
428 people in some countries such as the UK and US garnering funding for evidence-based  
429 practices. The major neglect of data on physical health outcomes might be related to the  
430 considerable difficulties in recording and extracting *routine* health data that is specific  
431 enough to differentiate Deaf people from anyone who is categorised with a hearing  
432 disability in routine health data collection [45]. For example James et al. [25] in a study on  
433 emergency department encounters, highlighted the possibility that DHH ASL users were  
434 being mis-recorded as DHH English speakers. The invisibility of the Deaf population within  
435 clinical records is likely to contribute to a lack of focus on whether their outcomes are  
436 similar to those of the bigger population of adults with a hearing loss or disability but who  
437 are not members of a cultural-linguistic minority whose engagement with health services is  
438 fundamentally mediated by problems of linguistic access and cultural competence [46]. In

439 addition, the overwhelming majority of the included studies concern Deaf people who  
440 reside in economically well-resourced countries. Yet, nearly 80% of people who experience  
441 deafness, whether sign language users or not, reside in low- and middle- income countries  
442 [1].

443 The reasons for the health inequalities experienced by Deaf individuals are multiple and  
444 complex, both access to and communication with health services and clinicians are  
445 commonly cited problems [7]. Around 5% of deaf children have one or more parents who  
446 are d/Deaf, meaning that the vast majority are born to hearing parents, who usually have  
447 little experience of deafness and often have little or no knowledge of signed languages [47].

448 Age-appropriate literacy remains a key barrier to accessing information for a great many  
449 d/Deaf people and is especially apparent amongst sign language users of previous  
450 generations whose access to and quality of education has been particularly poor [48, 49].

451 The responsiveness of health services and health interventions to provide and promote  
452 understanding of health conditions in a signed language is also identified as inadequate in  
453 many countries. Deaf individuals are up to 7 times more likely to experience poor health  
454 literacy than their hearing counterparts, something which is closely tied to unhealthy  
455 behaviours, limited healthcare seeking behaviours, decreased service use and poorer health  
456 outcomes [50, 51, 52]. Studies show that Deaf people have limited knowledge of the  
457 symptoms of certain medical emergencies, such as heart attacks and strokes, and that in the  
458 US, only 61% would contact the emergency services in such cases [53]. Research has also  
459 explored the issue of inadequate adaptation of clinical and psychological assessment tools  
460 for use with Deaf patients [54, 55], resulting in both under and overdiagnosis of potentially  
461 serious health conditions and inadequate tracking of recovery [43, 56]. Understandably,  
462 Deaf populations have previously reported feelings of mistrust towards healthcare

463 professionals [7], these populations are also found to be less likely to see the value in  
464 healthcare consultations when compared with the general population [57]. Aggravating this,  
465 many Deaf patients also have difficulty complaining about the healthcare barriers they face,  
466 as complaints processes often do not accommodate for sign language users [58].  
467 Consequentially, healthcare professionals are unaware of the relevant issues, and no action  
468 is taken to amend them.

## 469 **CONCLUSION**

470 This comprehensive systematic review on health outcomes in Deaf signing populations has  
471 highlighted health inequalities in comparison to general populations and within their own  
472 communities.

473

## 474 **REFERENCES**

- 475 [1] World Health Organization. Deafness and hearing loss. [Internet]. 2021 [updated 2023  
476 February 27; cited 2023 June 26]. Available from: [https://www.who.int/news-room/fact-](https://www.who.int/news-room/fact-sheets/detail/deafness-and-hearing-loss)  
477 [sheets/detail/deafness-and-hearing-loss](https://www.who.int/news-room/fact-sheets/detail/deafness-and-hearing-loss).
- 478 [2] National Geographic. [Internet]. 2023 [updated 2023 October 19; cited 2023 October 31].  
479 Available from: <https://education.nationalgeographic.org/resource/sign-language/>
- 480 [3] United Nations. [Internet]. 2023 [cited 2023 October 31]. Available from:  
481 <https://www.un.org/en/observances/sign-languages-day>
- 482 [4] Sutton-Spence R, Woll B. The linguistics of British Sign Language: an introduction. Cambridge,  
483 UK; 1999.
- 484 [5] Ladd P. Understanding Deaf Culture: In search of Deafhood. Clevedon; 2003.
- 485 [6] Alexander A, Ladd P, Powell S. Deafness might damage your health. *Lancet*. 2012, Mar 17; 379:  
486 (9820):979–81. doi: [https://doi.org/10.1016/S0140-6736\(11\)61670-X](https://doi.org/10.1016/S0140-6736(11)61670-X).

- 487 [7] Emond A, Ridd M, Sutherland H, Allsop L, Alexander A, Kyle J. Access to primary care affects  
488 the health of Deaf people. *British Journal of General Practice*. 2015; 65(631):95-96. doi:  
489 <https://doi.org/10.3399/bjgp15X683629>
- 490 [8] Emond A, Ridd M, Sutherland H, Allsop L, Alexander A, Kyle J. The current health of the signing  
491 Deaf community in the UK compared with the general population: a cross-sectional study.  
492 *BMJ Open*. 2015, Jan 15; 5:e006668. doi: <https://doi.org/10.1136/BMJOPEN-2014-006668>.
- 493 [9] Barnett S, Klein JD, Pollard PQ, Samar V, Schlehofer D, Starr M, Sutter E, Yang H, Pearson TA.  
494 Community Participatory Research With Deaf Sign Language Users to Identify Health  
495 Inequities. *American Journal of Public Health*. 2011 Dec;101(12):2235-8. doi:  
496 [10.2105/AJPH.2011.300247](https://doi.org/10.2105/AJPH.2011.300247).
- 497 [10] Shields GE, Rogers KD, Youn, A, Dedotsi S, Davies LM. Health State Values of Deaf British Sign  
498 Language (BSL) Users in the UK: An Application of the BSL Version of the EQ-5D-5L. *Applied  
499 Health Economics and Health Policy*. 2020, Jan 16;18:547–556. doi:  
500 <https://doi.org/10.1007/s40258-019-00546-8>
- 501 [11] Humphries T, Kushalnagar P, Mathur G, Napoli DJ, Padden C, Rathmann C, Smith C. Avoiding  
502 Linguistic Neglect of Deaf Children. *Social Service Review*. 2016, Dec; 90(4):589-619. doi:  
503 <https://doi.org/10.1086/689543>.
- 504 [12] Schenkel LS, Rothman-Marshall G, Schlehofer DA, Towne TL, Burnash DL, Priddy BM. Child  
505 maltreatment and trauma exposure among deaf and hard of hearing young adults. *Child  
506 Abuse & Neglect*. 2014, Oct;38(10):1581–9. doi:  
507 <https://doi.org/10.1016/J.CHIABU.2014.04.010>.
- 508 [13] Earis H, Reynolds S. Deaf and hard-of-hearing people’s access to primary health care services  
509 in North East Essex: A report for North East Essex Primary Care Trust. [Internet] 2009. [cited  
510 2023 January 18]. Available from: [http://www.sally-reynolds.com/wp-  
511 content/uploads/2012/12/Report-on-access-for-NE-Essex-PCT.pdf](http://www.sally-reynolds.com/wp-content/uploads/2012/12/Report-on-access-for-NE-Essex-PCT.pdf)

- 512 [14] Tranebjærg L, Samson RA, Green GE. Jervell and Lange-Nielsen Syndrome. In: Adam MP,  
513 Everman DB, Mirzaa GM, et al., editors. GeneReviews® [Internet]. Seattle (WA): University of  
514 Washington, Seattle; 1993-2023. Available from:  
515 <https://www.ncbi.nlm.nih.gov/books/NBK1405/>
- 516 [15] Ehn M, Wahlqvist M, Danermark B, Dahlström Ö, Möller C. Health, work, social trust, and  
517 financial situation in persons with Usher syndrome type 1. *Work*. 2018;60(2):209-220. doi:  
518 10.3233/WOR-182731.
- 519 [16] Peñacoba C, Garvi D, Gómez L, Álvarez A. Psychological Well-Being, Emotional Intelligence,  
520 and Emotional Symptoms in Deaf Adults. *American Annals of the Deaf*. 2020;165(4):436-452.  
521 doi: 10.1353/aad.2020.0029.
- 522 [17] Perrodin-Njoku E, Corbett C, Moges-Riedel R, Simms L, Kushalnagar P. Health disparities  
523 among Black deaf and hard of hearing Americans as compared to Black hearing Americans: A  
524 descriptive cross-sectional study. *Medicine*. 2022 Jan 14;101(2):e28464. doi:  
525 10.1097/MD.00000000000028464.
- 526 [18] Druel V, Hayet H, Esman L, Clavel M, Rougé Bugat ME. Assessment of cancers' diagnostic stage  
527 in a Deaf community - survey about 4363 Deaf patients recorded in French units. *BMC Cancer*.  
528 2018 Jan 23;18(1):93. doi: 10.1186/s12885-017-3972-3.
- 529 [19] James TG, McKee MM, Sullivan MK, Ashton G, Hardy SJ, Santiago Y, Phillips DG, Cheong J.  
530 Community-Engaged Needs Assessment of Deaf American Sign Language Users in Florida,  
531 2018. *Public Health Reports*. 2022 Jul-Aug;137(4):730-738. doi: 10.1177/00333549211026782.
- 532 [20] Kushalnagar P, Reesman J, Holcomb T, Ryan C. Prevalence of Anxiety or Depression Diagnosis  
533 in Deaf Adults. *Journal of Deaf Studies and Deaf Education*. 2019 Oct 1;24(4):378-385. doi:  
534 10.1093/deafed/enz017.
- 535 [21] Kvam MH, Loeb M, Tambs K. Mental health in deaf adults: symptoms of anxiety and  
536 depression among hearing and deaf individuals. *Journal of Deaf Studies and Deaf Education*.  
537 2007 Winter;12(1):1-7. doi: 10.1093/deafed/enl015.

- 538 [22] Werngren-Elgström M, Dehlin O, Iwarsson S. Aspects of quality of life in persons with pre-  
539 lingual deafness using sign language: subjective wellbeing, ill-health symptoms, depression  
540 and insomnia. *Archives of Gerontology and Geriatrics*. 2003 Jul-Aug;37(1):13-24. doi:  
541 10.1016/s0167-4943(03)00003-7.
- 542 [23] Rogers KD, Dodds C, Campbell M, Young A. The validation of the Short Warwick-Edinburgh  
543 Mental Well-Being Scale (SWEMWBS) with deaf British sign language users in the UK. *BMC*  
544 *Health and Quality of Life Outcomes*. 2018 Jul 24;16(1):145. doi: 10.1186/s12955-018-0976-x.
- 545 [24] Simons AN, Moreland CJ, Kushalnagar P. Prevalence of Self-Reported Hypertension in Deaf  
546 Adults Who Use American Sign Language. *American Journal of Hypertension*. 2018 Oct  
547 15;31(11):1215-1220. doi: 10.1093/ajh/hpy111.
- 548 [25] James TG, McKee MM, Miller MD, Sullivan MK, Coady KA, Varnes JR, Pearson TA, Yurasek AM,  
549 Cheong J. Emergency department utilization among deaf and hard-of-hearing patients: A  
550 retrospective chart review. *Disability and Health Journal*. 2022 Jul;15(3):101327. doi:  
551 10.1016/j.dhjo.2022.101327.
- 552 [26] Vichayanrat T, Kositpumivate W. Oral health conditions and behaviors among hearing  
553 impaired and normal hearing college students at Ratchasuda College, Nakhon Pathom,  
554 Thailand. *Southeast Asian Journal of Tropical Medicine and Public Health*. 2014  
555 Sep;45(5):1228-35.
- 556 [27] Wahlqvist M, Möller K, Möller C, Danermark B. Physical and psychological health, social trust,  
557 and financial situation for persons with Usher syndrome type 1. *British Journal of Visual*  
558 *Impairment*. 2016;34(1):15-25. doi: <https://doi.org/10.1177/0264619615610158>
- 559 [28] Barnett SL, Matthews KA, Sutter EJ, DeWindt LA, Pransky JA, O'Hearn AM, David TM, Pollard  
560 RQ, Samar VJ, Pearson TA. Collaboration With Deaf Communities to Conduct Accessible Health  
561 Surveillance. *American Journal of Preventive Medicine*. 2017 Mar;52(3 Suppl 3):S250-S254.  
562 doi: 10.1016/j.amepre.2016.10.011.

- 563 [29] Rogers KD, Pilling M, Davies L, Belk R, Nassimi-Green C, Young A. Translation, validity and  
564 reliability of the British Sign Language (BSL) version of the EQ-5D-5L. *Quality of Life Research*.  
565 2016 Jul;25(7):1825-34. doi: 10.1007/s11136-016-1235-4.
- 566 [30] Fellingner J, Holzinger D, Dobner U, Gerich J, Lehner R, Lenz G, Goldberg D. Mental distress and  
567 quality of life in a deaf population. *Social Psychiatry and Psychiatric Epidemiology*. 2005  
568 Sep;40(9):737-42. doi: 10.1007/s00127-005-0936-8.
- 569 [31] Henning MA, Krägeloh CU, Sameshima S, Shepherd D, Shepherd G, Billington R. Access to New  
570 Zealand Sign Language interpreters and quality of life for the deaf: a pilot study. *Disability and  
571 Rehabilitation*. 2011;33(25-26):2559-66. doi: 10.3109/09638288.2011.579225.
- 572 [32] Kushalnagar P, Miller CA. Health Disparities Among Mid-to-Older Deaf LGBTQ Adults  
573 Compared with Mid-to-Older Deaf Non-LGBTQ Adults in the United States. *Health Equity*.  
574 2019 Oct 30;3(1):541-547. doi: 10.1089/heq.2019.0009.
- 575 [33] Anderson ML, Kelly S, Wolf Craig KS, Hostovsky S, Bligh M, Bramande E, Walker K, Biebel K,  
576 Byatt N. Creating the Capacity to Screen Deaf Women for Perinatal Depression: A Pilot Study.  
577 *Midwifery*. 2021 Jan; 92:102867. doi: 10.1016/j.midw.2020.102867
- 578 [34] Sanfacon K, Leffers A, Miller C, Stabbe O, DeWindt L, Wagner K, Kushalnagar P. Cross-Sectional  
579 Analysis of Medical Conditions in the U.S. Deaf Transgender Community. *Transgender Health*.  
580 2021 Jun 2;6(3):132-138. doi: 10.1089/trgh.2020.0028.
- 581 [35] Chapman M, Dammeyer J. The Significance of Deaf Identity for Psychological Well-Being.  
582 *Journal of Deaf Studies and Deaf Education*. 2017 Apr;22(2):187-194. doi:  
583 10.1093/deafed/enw073.
- 584 [36] McKee MM, McKee K, Winters P, Sutter E, Pearson T. Higher educational attainment but not  
585 higher income is protective for cardiovascular risk in Deaf American Sign Language (ASL) users.  
586 *Disability and Health Journal*. 2014 Jan;7(1):49-55. doi: 10.1016/j.dhjo.2013.07.001.

- 587 [37] Ammons D, Engelman A, Kushalnagar P. Quality of Life and Needs of Deaf Informal Caregivers  
588 of Loved Ones with Alzheimer’s and Related Dementia. *Gerontology & Geriatric Medicine*.  
589 2020 Oct 21;6,2333721420966518. doi: 10.1177/2333721420966518
- 590 [38] Duarte SBR, Chaveiro N, de Freitas AR, Barbosa MA, Camey S, Fleck MP, Porto CC, Rodrigues  
591 CL, Rodríguez-Martín D. Validation of the WHOQOL-Bref instrument in Brazilian sign language  
592 (Libras). *Quality of Life Research*. 2021 Jan;30(1):303-313. doi: 10.1007/s11136-020-02611-5.
- 593 [39] Kushalnagar P, Ryan C, Paludneviene R, Spellun A, Gulati S. Adverse Childhood  
594 Communication Experiences Associated With an Increased Risk of Chronic Diseases in Adults  
595 Who Are Deaf. *American Journal of Preventive Medicine* 2020 Oct;59(4):548-554. doi:  
596 10.1016/j.amepre.2020.04.016.
- 597 [40] Øhre B, Volden M, Falkum E, von Tetzchner S. Mental Disorders in Deaf and Hard of Hearing  
598 Adult Outpatients: A Comparison of Linguistic Subgroups. *Journal of Deaf Studies and Deaf*  
599 *Education*. 2017 Jan;22(1):105-117. doi: 10.1093/deafed/enw061.
- 600 [41] Munro L, Rodwell J. Validation of an Australian sign language instrument of outcome  
601 measurement for adults in mental health settings. *Australian and New Zealand Journal of*  
602 *Psychiatry*. 2009 Apr;43(4):332-9. doi: 10.1080/00048670902721111.
- 603 [42] Rogers KD, Young A, Lovell K, Campbell M, Scott PR, Kendal S. The British Sign Language  
604 versions of the Patient Health Questionnaire, the Generalized Anxiety Disorder 7-item Scale,  
605 and the Work and Social Adjustment Scale. *Journal of Deaf Studies and Deaf Education*. 2013  
606 Jan;18(1):110-22. doi: 10.1093/deafed/ens040.
- 607 [43] Belk RA, Pilling M, Rogers KD, Lovell K, Young A. The theoretical and practical determination of  
608 clinical cut-offs for the British Sign Language versions of PHQ-9 and GAD-7. *BMC Psychiatry*.  
609 2016 Nov 3;16(1):372. doi: 10.1186/s12888-016-1078-0.
- 610 [44] Barnett S, Matthews K, DeWindt L, Sutter E, Samuel-Hodge C, Yang H, Pearson TA. Deaf  
611 Weight Wise: A novel randomized clinical trial with Deaf sign language users. *Obesity*. 2023  
612 Mar 8;31(4):965-976. doi: <https://doi.org/10.1002/oby.23702>



- 613 [45] Office for National Statistics (ONS). Coronavirus (COVID-19) related deaths by hearing and  
614 vision impairment status, England methodology. [Internet]. 2022 [cited 2023 January 18]  
615 Available from:  
616 [https://www.ons.gov.uk/peoplepopulationandcommunity/healthandsocialcare/disability/met](https://www.ons.gov.uk/peoplepopulationandcommunity/healthandsocialcare/disability/methodologies/coronaviruscovid19relateddeathsbyhearingandvisionimpairmentstatusenglandmethodology)  
617 [hodologies/coronaviruscovid19relateddeathsbyhearingandvisionimpairmentstatusenglandme](https://www.ons.gov.uk/peoplepopulationandcommunity/healthandsocialcare/disability/methodologies/coronaviruscovid19relateddeathsbyhearingandvisionimpairmentstatusenglandmethodology)  
618 [thodology](https://www.ons.gov.uk/peoplepopulationandcommunity/healthandsocialcare/disability/methodologies/coronaviruscovid19relateddeathsbyhearingandvisionimpairmentstatusenglandmethodology)
- 619 [46] Hulme C, Rogers K, Young A, Munro K. Deaf Sign Language Users and Audiology Services: A  
620 scoping review on cultural competence practices. In: Hulme, C. Improving Patient Experience,  
621 Service access and outcomes in NHS Hearing Aid Services for Deaf adults who use British Sign  
622 Language. PhD thesis, The University of Manchester; 2022.
- 623 [47] Mitchell RE, Karchmer, MA. Chasing the Mythical Ten Percent: Parental Hearing Status of Deaf  
624 and Hard of Hearing Students in the United States. *Sign Language Studies*. 2004, Winter;  
625 4(2):138-163. doi: 10.1353/sls.2004.0005
- 626 [48] Conrad R. The deaf schoolchild: Language and cognitive function: R. Conrad. London; 1979.
- 627 [49] Mayer C. What Really Matters in the Early Literacy Development of Deaf Children. *Journal of*  
628 *Deaf Studies and Deaf Education*. 2007, June; 12(4):411-431. doi:  
629 <https://doi.org/10.1093/deafed/enm020>.
- 630 [50] McKee MM, Paasche-Orlow M, Winters PC, Fiscella K, Zazove P, Sen A, Pearson T. Assessing  
631 Health Literacy in Deaf American Sign Language Users. *Journal of Health Communication*.  
632 2015, Oct;20(2):92-100. doi: <https://doi.org/10.1080/10810730.2015.1066468>.
- 633 [51] Protheroe J, Nutbeam D, Rowlands G. Health literacy: a necessity for increasing participation  
634 in health care. *British Journal of General Practice*. 2009, Oct 1;59(567):721–3. doi:  
635 <https://doi.org/10.3399/BJGP09X472584>.
- 636 [52] Naseribooriabadi T, Sadoughi F, Sheikhtaheri A. Barriers and Facilitators of Health Literacy  
637 among D/deaf Individuals: A Review Article. *Iranian Journal of Public Health*. 2017  
638 Nov;46(11):1465-1474.

- 639 [53] Margellos-Anast H, Estarziau M, Kaufman G. Cardiovascular disease knowledge among  
640 culturally Deaf patients in Chicago. *Preventive Medicine*. 2006, Mar;42(3):235–239. doi:  
641 <https://doi.org/10.1016/J.YPMED.2005.12.012>.
- 642 [54] Palese A, Salvador L, Cozzi D. One-Dimensional Scales for Pain Evaluation Adopted in Italian  
643 Nursing Practice: Giving Preference to Deaf Patients. *Journal of Nursing Measurement*. 2011,  
644 Jan;19(2):91–104. doi: <https://doi.org/10.1891/1061-3749.19.2.91>.
- 645 [55] Rogers KD, Ferguson-Coleman E, Young A. Challenges of Realising Patient-Centred Outcomes  
646 for Deaf Patients. *The Patient: Patient-Centered Outcomes Research*. 2018, Feb; 11(1):9–16.  
647 doi: 10.1007/s40271-017-0260-x
- 648 [56] Young A, Ferguson-Coleman E, Wright B, LeCouteur A. Parental Conceptualizations of Autism  
649 and Deafness in British Deaf Children. *Journal of Deaf Studies and Deaf Education*. 2019, July;  
650 24(3):280-288. doi: <https://doi.org/10.1093/deafed/enz002>
- 651 [57] Sahota O, Boff A, Malthouse K, Qureshi M, Shawcross V. Access to health services for deaf  
652 people. London Assembly. [Internet]. 2015 [cited 2023 January 18] Available from:  
653 [https://www.london.gov.uk/sites/default/files/london\\_assembly\\_health\\_committee\\_-\\_](https://www.london.gov.uk/sites/default/files/london_assembly_health_committee_-_access_to_health_services_for_deaf_people_-_june_2015_-_updated.pdf)  
654 [access\\_to\\_health\\_services\\_for\\_deaf\\_people\\_-\\_june\\_2015\\_-\\_updated.pdf](https://www.london.gov.uk/sites/default/files/london_assembly_health_committee_-_access_to_health_services_for_deaf_people_-_june_2015_-_updated.pdf)
- 655 [58] NHS Liverpool CCG. Understanding Experiences of D/deaf People and People with Hearing  
656 Loss in Getting Information and Communication Support from the NHS in Liverpool. 2<sup>nd</sup> May  
657 2018 Engagement Meeting Report. NHS Liverpool CCGs Engagement Team. [Internet. 2018  
658 [cited 2023, January 18] Available from:  
659 [https://www.liverpoolccg.nhs.uk/media/3391/liverpool-nhs-final-report-and-actions-deaf-](https://www.liverpoolccg.nhs.uk/media/3391/liverpool-nhs-final-report-and-actions-deaf-hearing-loss-final.pdf)  
660 [hearing-loss-final.pdf](https://www.liverpoolccg.nhs.uk/media/3391/liverpool-nhs-final-report-and-actions-deaf-hearing-loss-final.pdf)
- 661 [59] Crowe TV, Gimire B, Trollo S. The mental health needs of deaf adults in Nepal. *International*  
662 *Social Work*. 2016; 59(4),508-522. doi: 10.1177/0020872814539983

- 663 [60] Horton HK. Linguistic ability and mental health outcomes among deaf people with  
664 schizophrenia. *Journal of Nervous and Mental Disease*. 2010 Sep;198(9):634-42. doi:  
665 10.1097/NMD.0b013e3181e9dd23.

## PRISMA flow diagram

Figure 1. PRISMA flow diagram: the findings from the searches

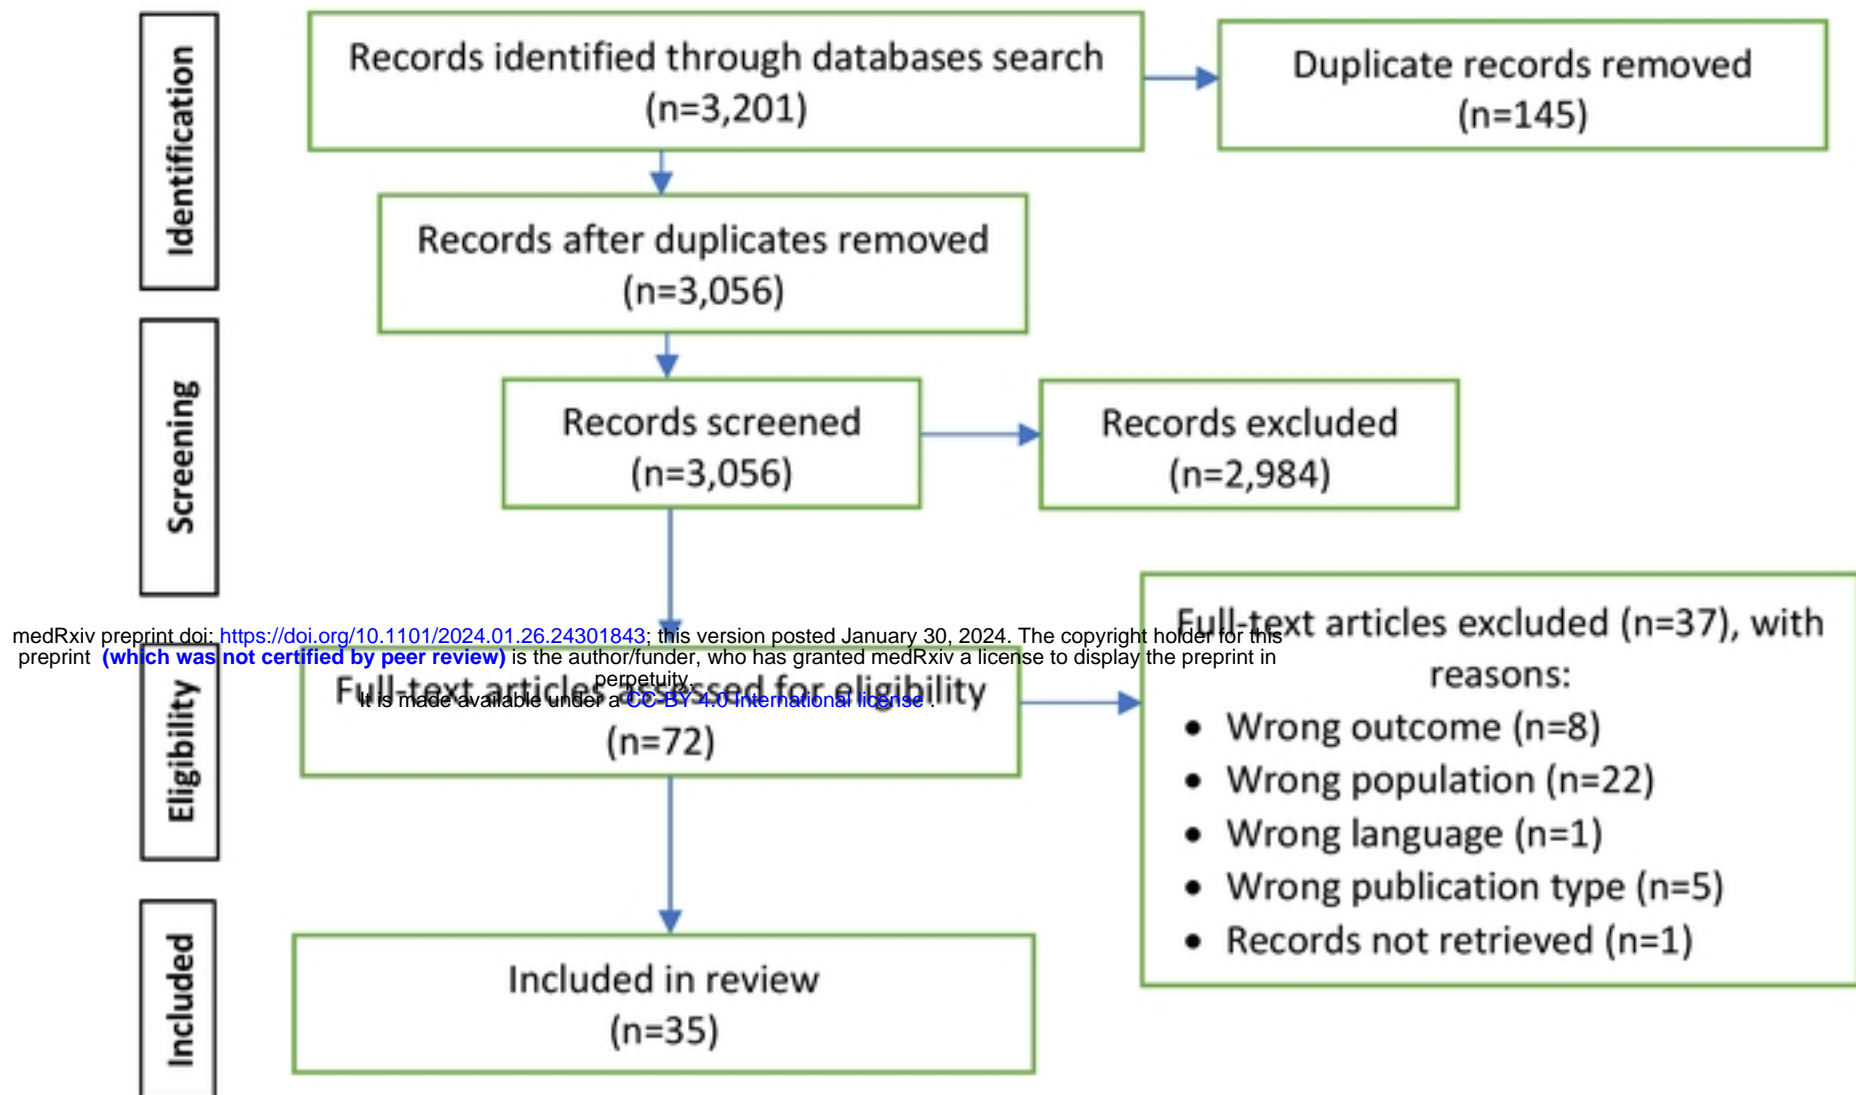

Source: https://medrxiv.org/content/10.1101/2024.01.26.24301843.full.pdf
